# Supplementary material for: Cpmer: A new conserved eEF1A2-binding partner that regulates Eomes translation and cardiomyocyte differentiation
Source: PubMed Central journal article supplement — Stem Cell Reports. 2022 Apr 7;17(5):1154–69. doi: 10.1016/j.stemcr.2022.03.006 (PMC9133893; doi:10.1016/j.stemcr.2022.03.006), 2022-04-07
Supplement: mmc1.pdf [file mmc1.pdf]

**Stem Cell Reports, Volume 17**

**Supplemental Information**

***Cpmer*: A new conserved eEF1A2-binding partner that regulates *Eomes* translation and cardiomyocyte differentiation**

**Yao Lyu, Wenwen Jia, Yukang Wu, Xin Zhao, Yuchen Xia, Xudong Guo, and Jihong Kang**

## Supplemental Information

### Supplemental Figures and Legends:

**Figure S1.** Identification of *Cpmer* as a non-coding RNA. Related to figure 1.

**Figure S2.** The effect of *Cpmer* on the expression of pluripotent genes, neighbor gene, and lineage genes. Related to figure 2.

**Figure S3.** *Cpmer* specifically affects the translation of Eomes, which is critical for the CM differentiation, independent of the eEF1A recruitment in ribosome complex. Related to figure 4.

**Figure S4.** Single exon of *Cpmer* is not able to rescue the EOMES expression or CM differentiation. Related to figure 5.

**Figure S5.** Knockdown of *Cpmer* after mesoderm stage also inhibits the CM differentiation. Related to figure 5.

**Figure S6.** Expression patterns of stage-specific markers and *EEF1A2* gene during hESC-derived CM differentiation. Related to figure 6.

### Supplemental Tables:

**Table S1.** Sequence information of de novo lncRNAs. Related to figure 1.

**Table S2.** Protein identification results for Biotin-labeled *Cpmer* RNA pull-down experiments. Related to figure 3.

**Table S3.** RIBlast result. Related to figure 4.

**Table S4.** Primers used for vector construction.

**Table S5.** Primers used in qRT-PCR.

**Table S6.** Antibodies used in the study.

### Supplemental Experimental Procedures

#### Supplementary Data of Whole Membrane Image

## Supplemental Figures and Legends:

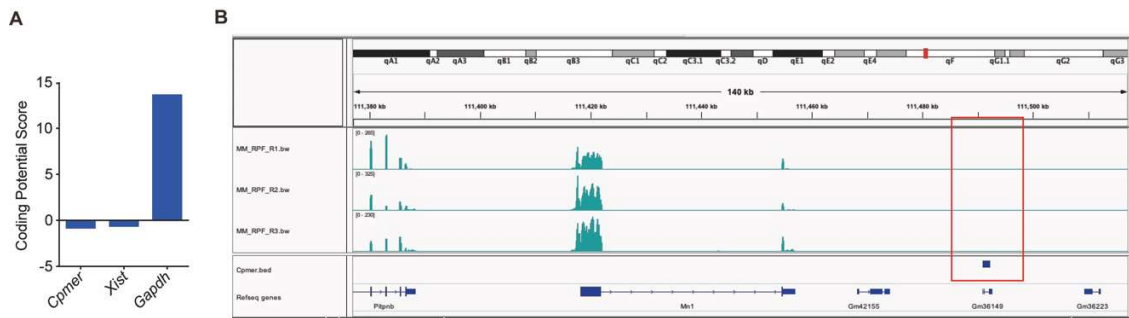

**Figure S1. Identification of *Cpmer* as a non-coding RNA.** Related to figure 1.

(A) The coding potential prediction of *Cpmer*, *Xist*, and *Gapdh* by Coding Potential Calculator (<http://cpc.gao-lab.org>).

(B) The ribosome occupancy analysis of the *Cpmer* and *Mn1* mRNA in mesoderm cells (GSE86467).

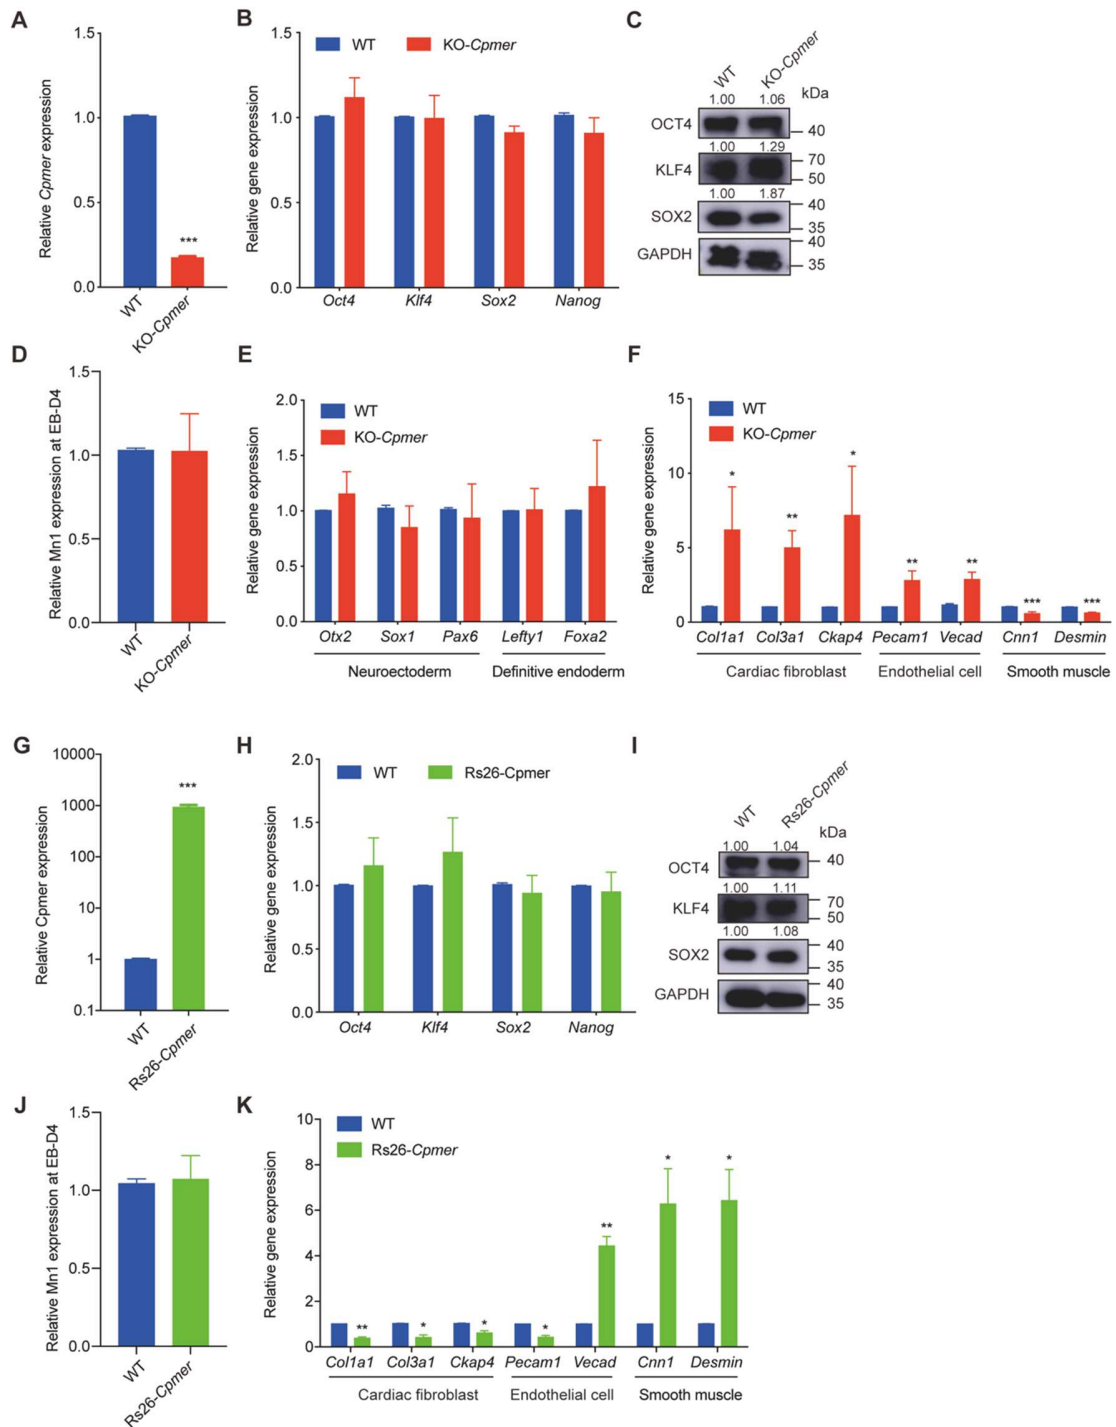

**Figure S2. The effect of *Cpmer* on the expression of pluripotent genes, neighbor gene, and lineage genes.** Related to figure 2.

(A-B) qRT-PCR analysis of the expression of *Cpmer* and pluripotency-related genes in KO-*Cpmer* ESCs compared with WT ESCs. Data shown are the mean  $\pm$  SEM, n=3 independent experiments.

(C) Western blotting analysis of pluripotency-related gene expression in WT and KO-*Cpmer* ESCs.

- (D) qRT-PCR analysis of *Mn1* expression in KO-*Cpmer* MES cells compared with WT cells. Data shown are the mean  $\pm$  SEM, n=3 independent experiments.
- (E) qRT-PCR analysis of the expression of neuroectoderm markers (*Otx2*, *Sox1*, and *Pax6*) and definitive endoderm markers (*Lefty1* and *Foxa2*) in KO-*Cpmer* cells compared with WT cells. Data shown are the mean  $\pm$  SEM, n=3 independent experiments.
- (F) qRT-PCR analysis of the expression of cardiac fibroblast markers (*Colla1*, *Col3a1*, and *Ckap4*), endothelial cell markers (*Pecam1* and *Vecad*), and smooth muscle markers (*Cnn1* and *Desmin*) in KO-*Cpmer* cells compared with WT cells. Data shown are the mean  $\pm$  SEM, n=3 independent experiments.
- (G-H) qRT-PCR analysis of the expression of *Cpmer* or pluripotency-related genes in Rs26-*Cpmer* ESCs compared with WT ESCs. Data shown are the mean  $\pm$  SEM, n=3 independent experiments.
- (I) Western blotting analysis of pluripotency-related gene expression in WT and Rs26-*Cpmer* ESCs.
- (J) qRT-PCR analysis of *Mn1* expression in Rs26-*Cpmer* MES cells compared with WT cells. Data shown are the mean  $\pm$  SEM, n=3 independent experiments.
- (K) qRT-PCR analysis of the expression of cardiac fibroblast markers, endothelial cell markers, and smooth muscle markers in Rs26-*Cpmer* cells compared with WT cells. Data shown are the mean  $\pm$  SEM, n=3 independent experiments.

\*P < 0.05, \*\*P < 0.01, and \*\*\*P < 0.001 (versus WT) by Student's t-test.

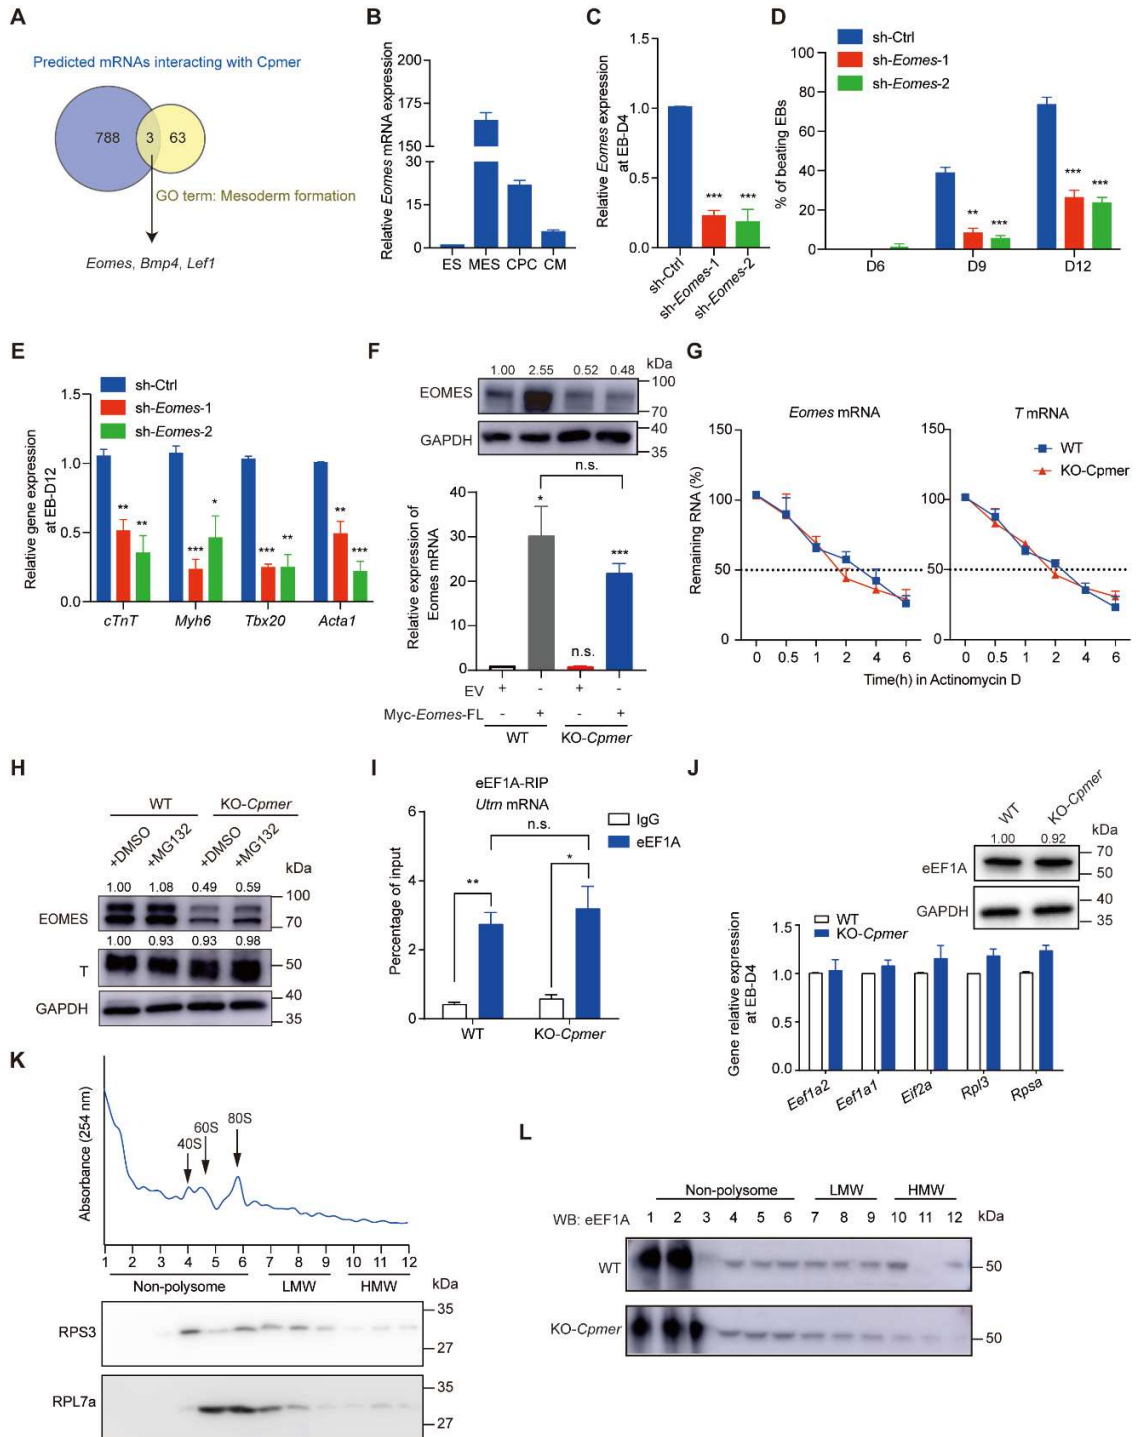

**Figure S3. *Cpmer* specifically affects the translation of *Eomes*, which is critical for the CM differentiation, independent of the eEF1A recruitment in ribosome complex. Related to figure 4.**

(A) Overlapping of the predicted mRNAs (791) interacted with *Cpmer* and the genes (66) associated with mesoderm formation (GO\_ID: 00010707).

- (B) The expression pattern of *Eomes* during CM differentiation. Data shown are mean  $\pm$  SEM, n=3 independent experiments.
- (C) The expression of *Eomes* at day 4 of EB differentiation after *Eomes* knockdown (sh-*Eomes*-1 and sh-*Eomes*-2) in ESCs. Data shown are mean  $\pm$  SEM, n=3 independent experiments.
- (D) Percentage of spontaneously contracting EBs determined at days 6, 9, and 12 of EB differentiation in *Eomes* knockdown cells compared with control cells. Data shown are mean  $\pm$  SEM, n=3 independent experiments.
- (E) qRT-PCR analysis of the CM marker genes in *Eomes* knockdown cells compared with control cells at day 12 of EB differentiation. Data shown are mean  $\pm$  SEM, n=3 independent experiments.
- (F) qRT-PCR and western blot analysis of *Eomes* mRNA and protein levels in the WT and KO-*Cpmer* cells transfected with full-length (FL) *Eomes* at the mesoderm stage. Data shown are mean  $\pm$  SEM, n=3 independent experiments.
- (G) The half-lives of *Eomes* and *T* mRNA were quantified after exposure to actinomycin D at different time points (0, 0.5, 1, 2, 4, and 6 h). Data shown are the mean  $\pm$  SEM, n=3 independent experiments.
- (H) Western blotting analysis of EOMES and T protein levels in the WT and KO-*Cpmer* mesoderm cells after treatment with MG132 (5  $\mu$ M) for 6 h.
- (I) Endogenous RIP analysis of the interaction of eEF1A with *Utrn* mRNA (as positive control) in the WT and KO-*Cpmer* cells at the mesoderm stage. Data shown are mean  $\pm$  SEM, n=3 independent experiments.
- (J) qRT-PCR and western blotting analysis of translation-related genes in the WT and KO-*Cpmer* cells at day 4 of EB differentiation (EB-D4). Data shown are mean  $\pm$  SEM, n=3 independent experiments.
- (K) Polysome trace analysis exhibited the presence of absorption peaks for free RNA, pre-polysome (40S, 60S, and 80S), and polysomes (LMW and HMW) (up) and the accompanying western blotting of RPS3 (40S ribosomal protein S3) and RPL7a (60S ribosomal protein L7a) (down).
- (L) Western blotting analysis of eEF1A distribution in polysome fractions of the WT and KO-*Cpmer* cells at EB-D4.

\*P < 0.05, \*\*P < 0.01, and \*\*\*P < 0.001 (versus sh-Ctrl) by Student's t-test.

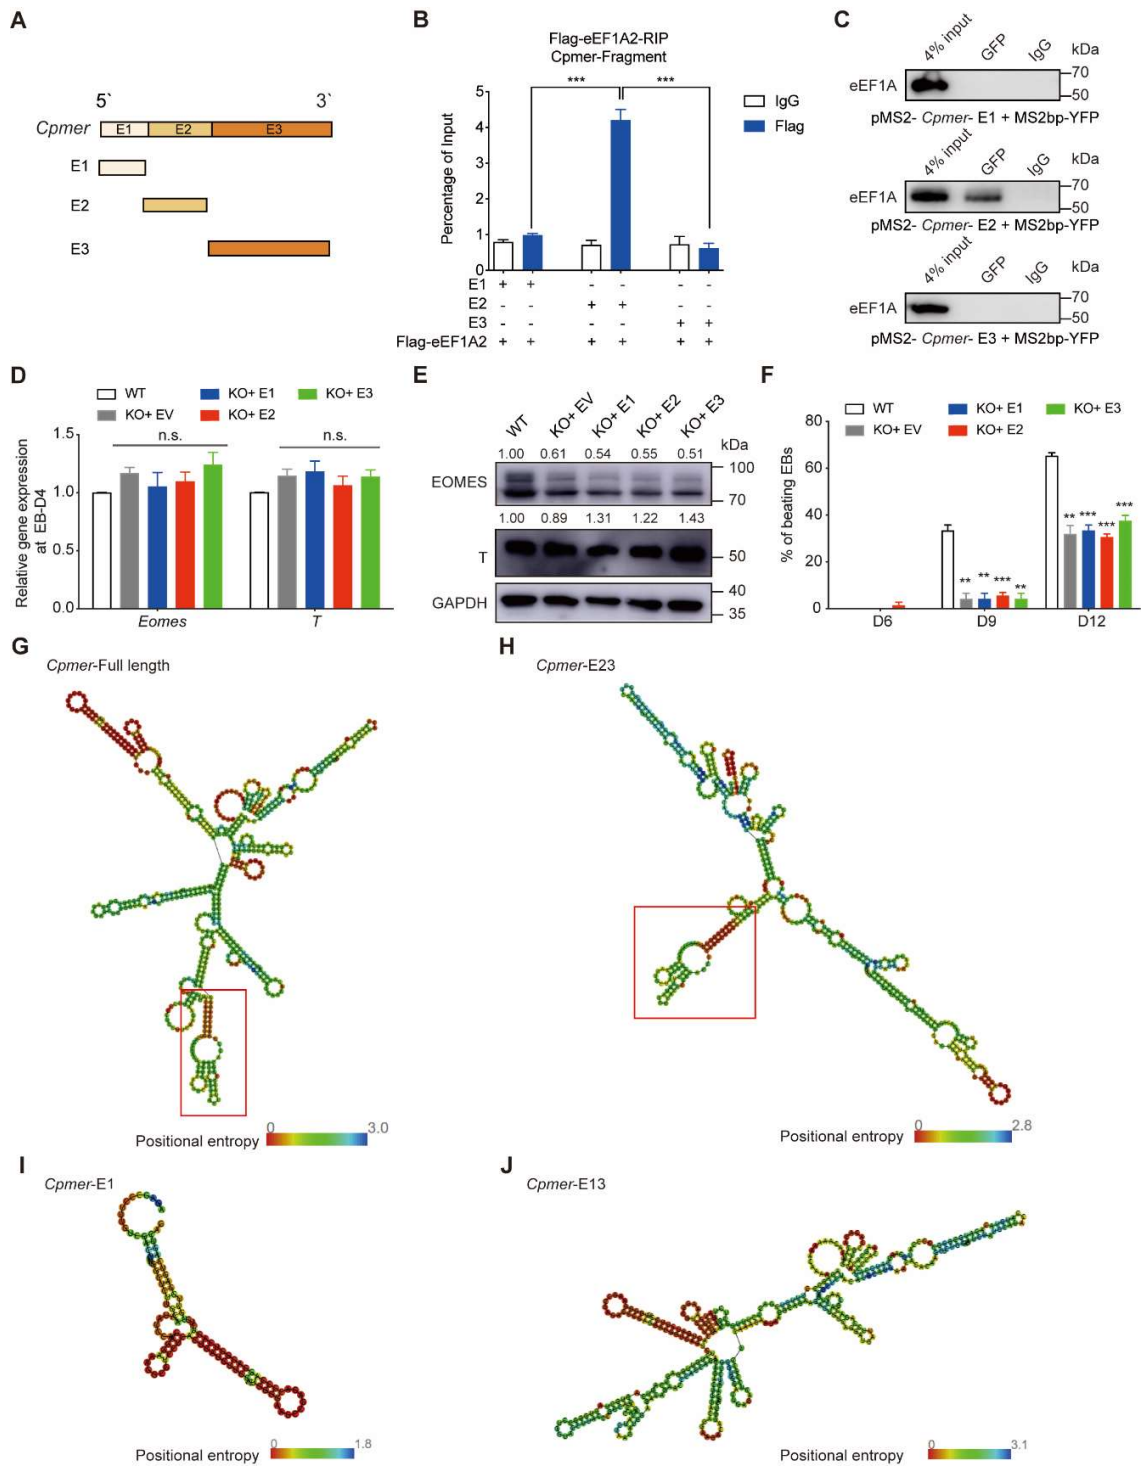

**Figure S4. Single exon of *Cpmer* is not able to rescue the EOMES expression or CM differentiation.**  
Related to figure 5.

(A) Schematic representation of the full-length *Cpmer* and three mutants (single exons: E1, E2, and E3).



- (B) RIP analysis for the exogenous expression of *Cpmer* mutants and Flag-eEF1A2 in 293T cells, as determined by anti-Flag antibody.
- (C) MS2bp-YFP RNA pull-down analysis for mesoderm cells co-transfected with MS2-*Cpmer* mutants and MS2bp-YFP.
- (D-E) qRT-PCR and western blotting analysis of *Eomes* and *T* expression in the KO-*Cpmer* cells transfected with different *Cpmer* mutants at mesoderm stage.
- (F) Percentage of spontaneously contracting EBs in the WT and KO-*Cpmer* cells transfected with different *Cpmer* mutants.

Data shown are the mean  $\pm$  SEM (n=3). \*\*P < 0.01 and \*\*\*P < 0.001 (versus WT) by Student's t-test.

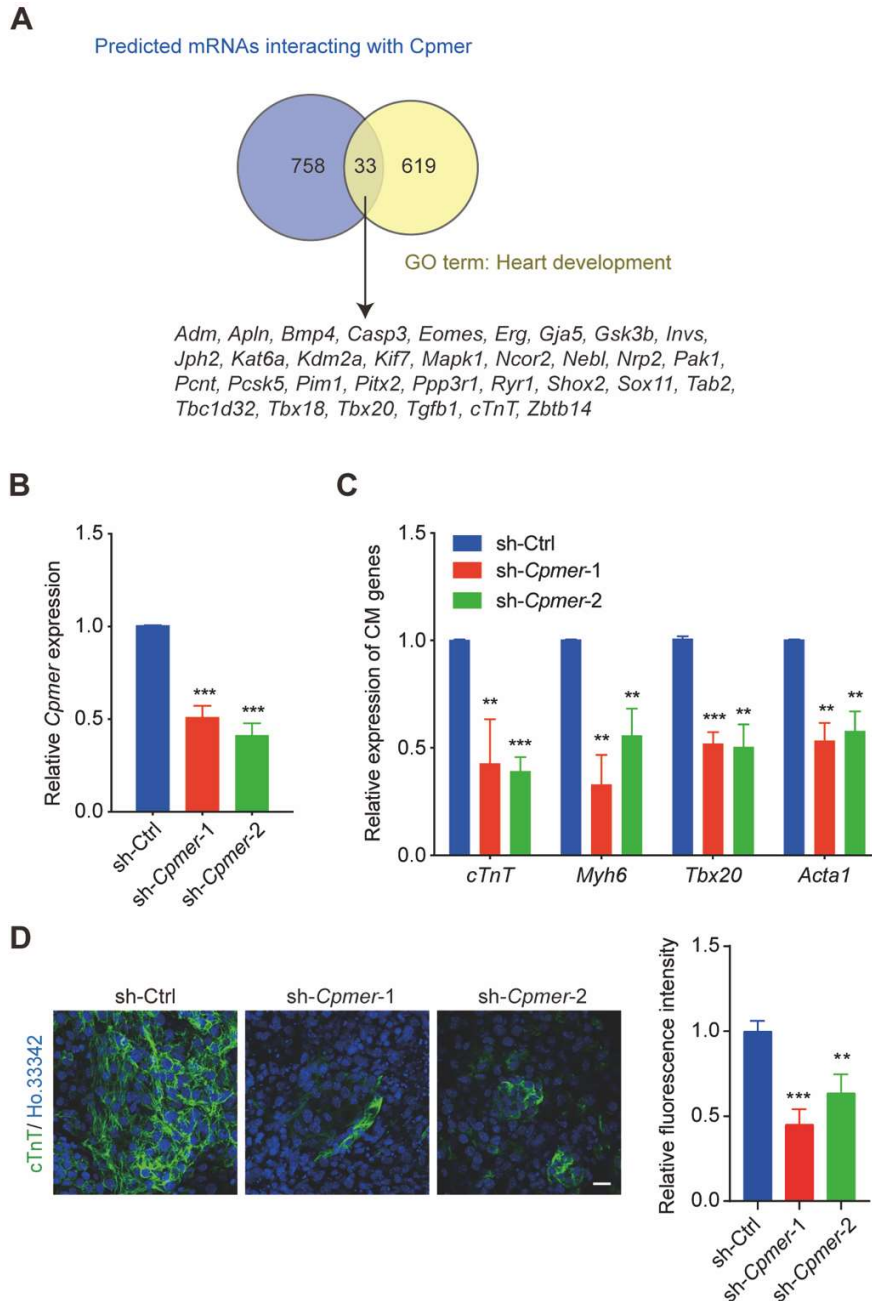

**Figure S5. Knockdown of *Cpmer* after mesoderm stage also inhibits the CM differentiation.**

Related to figure 5.

- (A) Overlapping of the predicted mRNAs (791) interacted with *Cpmer* and the genes (622) associated with heart development (GO\_ID:0007507).
- (B) The expression detection of *Cpmer* knockdown with shRNA virus (sh-*Cpmer*-1 and sh-*Cpmer*-2) after mesoderm stage. Data shown are mean  $\pm$  SEM, n=3 independent experiments.
- (C) qRT-PCR analysis of the CM marker genes in the *Cpmer* knockdown cells compared with control cells at day 8 of CM differentiation. Data shown are mean  $\pm$  SEM, n=3 independent experiments.

(D) cTnT immunostaining (green) in the *Cpmer* knockdown and control cells at day 8 of CM differentiation (left). The statistics for relative fluorescence intensity was shown (right). Scale bar, 20  $\mu\text{m}$ . Data shown are the mean  $\pm$  SEM (n= 6 fields from 3 independent experiments).

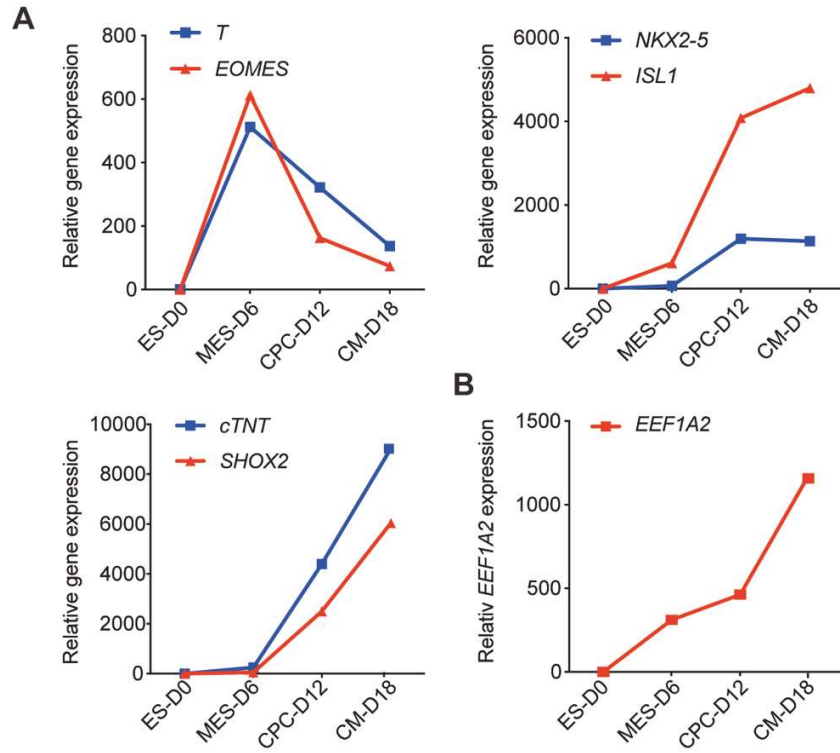

**Figure S6. Expression patterns of stage-specific markers and *EEF1A2* gene during hESC-derived CM differentiation.** Related to figure 6.

(A) qRT-PCR analysis of marker genes at the indicated stages (ES, MES, CPC, and CM) of hESC-derived CM differentiation.

(B) Expression pattern of *EEF1A2* during hESC-derived CM differentiation.

## **Supplemental Experimental Procedures**

### ***Cell culture and differentiation***

For EB differentiation, mESCs were plated at a density of  $4 \times 10^4$  cells/mL in ultralow-attachment plates in 5 mL of mESC medium without LIF. The medium was changed every 2 days. For beating EB analysis, single EBs were picked and reseeded onto gelatin-coated 48-well plates on the 4<sup>th</sup> day. Beating EBs were observed under a light microscope from the 6<sup>th</sup> day to the 12<sup>th</sup> day.

For mouse CM differentiation, mESCs were cultured in serum-free medium (DMEM: Neurobasal=1:1 (v/v) (Gibco), 0.05% BSA, 2 mM GlutaMAX,  $0.5 \times N2$  supplement (Gibco),  $0.5 \times B27$  supplement (Gibco),  $1.5 \times 10^{-4}$  M monothioglycerol, 10 ng/mL hBMP4 (R&D), and LIF (Millipore; 10000 $\times$ )) for 2 passages. The medium was changed every day. Then, EBs were aggregated at a density of  $6 \times 10^4$  cells/mL for 48 h in serum-free medium (DMEM: DMEM/Ham's F12=1:1 (v/v) (Gibco), 0.05% BSA, 2 mM GlutaMAX,  $1 \times N2$  supplement,  $1 \times B27$  supplement,  $4.5 \times 10^{-4}$  M monothioglycerol, and 25  $\mu$ g/ml L-ascorbic acid (Sigma-Aldrich)). EBs were dissociated with 0.125% trypsin and reaggregated in the presence of 0.2 ng/mL hBMP4, 5 ng/mL hVEGF (R&D), 5 ng/mL hActivin A (R&D), and 25  $\mu$ g/mL L-ascorbic acid for 40 h. EBs were dissociated and plated in gelatin-coated 12-well plates at a density of  $2.5 \times 10^5$  cells/well with StemPro-34 medium (Gibco) supplemented with 5 ng/mL hVEGF, 10 ng/mL hbFGF (R&D), 25 ng/mL hFGF10 (R&D), and 25  $\mu$ g/ml L-ascorbic acid. The medium was changed every day until contracting CMs were observed.

For hESCs induced CM differentiation, hESCs were incubated with dispase (Gibco) at 37°C for 5 mins. Then, colonies were cultured in suspension as EBs in basic StemPro-34 (Gibco) media for 18 h in ultralow attachments dishes. At day 1, EBs were cultured in pacemaker mesoderm induction media. At day 3, EBs were harvested and washed once then cultured in cardiac induction media. At day 6, media was changed to cardiac maintenance media, and the media was changed every 3 days until day 18.

### ***RNA-sequencing and bioinformatic analysis***

The whole heart samples were collected from embryos at E10.5, E14.5, E17.5, as well as the newborn and adult mice. Total RNA for RNA-seq analysis was isolated from the heart samples using RNAiso Reagent (TaKaRa) and paired-end RNA-seq for developing mouse hearts was performed. The RNA-seq reads of developing hearts were aligned to the mm9 UCSC reference gene GTF using TopHat2 with default parameters. The transcript assembly and differential expression analysis with the mm9 UCSC reference gene GTF and reference genome GSE52313 were performed through Cufflinks2 and Cuffdiff2 with default parameters, respectively. The upregulated lncRNAs were sorted by the changes in FPKM during heart development.

### ***Generation of Cpmer-knockout cell lines***

A dual guide RNA (gRNA) knockout strategy was used to completely knock out *Cpmer*. The gRNAs targeted to the 5' and 3' regions of *Cpmer* were designed by using the CRISPR DESIGN website (<https://zlab.bio/guide-design-resources>), and the detailed sequences are shown in Table S4. The gRNAs were inserted into the pX330 vector. Two gRNAs and Cas9 plasmids of 5 µg each were mixed in P3 primary Cell Solution Box (PBP3-00675, Lonza), electroporated into mESCs with the Gene Pulser X Cell System (Bio-Rad) at 250 V and 500 µF in a 0.4 cm Gene Pulser cuvette (Bio-Rad), and then seeded on feeder cells. 24 h later, 0.5 µg/mL puromycin was added for 2 days. Individual colonies were picked and expanded in 24-well plates with feeder cells. The genomic DNA from each colony was extracted by a TIANamp Genomic DNA Kit (DP304-03) and further verified by PCR.

### ***RACE***

To obtain the full-length sequence of the *Cpmer* transcript, 5 prime and 3 prime RACE methods were employed to amplify the cDNA of mouse heart tissue using the SMARTer RACE 5'/3' Kit (TaKaRa). cDNA with adapter addition was cloned into the pPLB vector (TIANGEN) and verified by sequencing. The sequences of gene-specific primers are listed in Table S4.

### ***Flow cytometry and cell sorting***

EBs generated from CM differentiation experiments at day 4 were dissociated with 0.125% trypsin (Gibco) and washed with 1× PBS. The dissociated cells were stained with 1 µL of CD140a (Pdgfr $\alpha$ )-APC antibody (130-109-784, Miltenyi Biotec.) and 1 µL of CD309 (Flk1)-PE antibody (130-102-559, Miltenyi Biotec.) for 30 min at room temperature. Then, the cells were washed with 1×PBS and analyzed by BD FACSVerser and FlowJo software.

### ***Biotin-RNA pull-down and LC-MS***

Biotin-labeled *Cpmer* was obtained using RNA Labeling Mix (11685597910, Roche) with T7 (10881767001, Roche) or T3 RNA polymerase (11031171001, Roche). 3 µg of total RNA was heated to 90°C for 2 min, held on ice for 2 min, and incubated in RNA structure buffer (10 mM Tris-HCl pH 7.0, 100 mM KCl, and 10 mM MgCl<sub>2</sub>) to allow the formation of the proper secondary structure. Cells at EB-D4 were lysed with RIP lysis buffer for 30 min on ice. IP was performed using streptavidin beads coated with biotin-labeled sense *Cpmer* or antisense *Cpmer*. The RNA-binding proteins were analyzed by LC-MS as described previously (Shevchenko et al., 2006). The mass spectrometry proteomics data have been deposited to the ProteomeXchange Consortium via the PRIDE (Perez-Riverol et al., 2022) partner repository with the dataset identifier PXD031814.

### ***RIP assay***

RIP was performed as previously described (Ng et al., 2012). Briefly,  $5 \times 10^6$  cells were lysed with RIP buffer (100 mM KCl, 5 mM MgCl<sub>2</sub>, 10 mM HEPES pH 7.0, 0.5% NP-40, and 1 mM dithiothreitol) for 30 min on ice to facilitate lysis. Three micrograms of anti-Flag (GNI4110, GNI) antibody was used to bind *Cpmer* or its fragments after Flag-eEF1A2 was ectopically expressed in 293T cells. Coimmunoprecipitated RNAs were extracted and analyzed by qRT-PCR. The enrichment was calculated relative to the percentage of input.

### ***MS2bp-YFP RNA pull-down***

Briefly, cells were cotransfected with 4  $\mu$ g of MS2bp-YFP overexpression plasmid, 4  $\mu$ g of pMS2-*Cpmer* (or its fragments) or control vector with Renilla luciferase inserts (pMS2-Renilla) mixed with 24  $\mu$ L Lipofectamine 3000 (Invitrogen). After 48 h, the cells were lysed with RIP buffer on ice for 30 min. The proteins were immunoprecipitated using control IgG (CST) or anti-GFP (ab290, Abcam). The RNA-protein complex was treated with RNAiso to purify RNA or SDS lysis buffer for western blotting.

### ***Polysome profile analysis***

Cells were treated with 100  $\mu$ g/mL cycloheximide (CHX) (S7418, Selleck) and incubated for 10 min at 37°C before harvest. The cells were washed twice with ice-cold 1 $\times$ PBS supplemented with 100  $\mu$ g/mL CHX. After centrifugation for 5 min at 1000 rpm, the cells were lysed with 1 mL polysome extraction buffer (20 mM Tris-HCl pH 7.5, 100 mM KCl, 5 mM MgCl<sub>2</sub>, and 0.5% NP-40) to which 100  $\mu$ g/mL CHX, protease inhibitors, RNase inhibitor were added before use. The samples were incubated on ice for 10 min and centrifuged at 13,000 rpm for 10 min. The supernatant was loaded onto the top of a 10-50% sucrose gradient in a 13.2-mL tube (331372, Beckman Coulter) and centrifuged for 90 min in an SW41Ti swinging bucket rotor (3331336, Beckman Coulter) at 39,000 rpm at 4°C with maximum acceleration and braking. The gradient was pumped out and fractions were collected into 12 1.5-mL tubes, and RNA was extracted from each tube. The polysome profile was analyzed by qRT-PCR. Eomes and T mRNA distributions across the polysome profile are presented as percentages. For the analysis of co-sedimenting proteins, trichloro-acetic acid (TCA) was added to each fraction (final 10% v/v). Then proteins were precipitated overnight at 4°C and centrifuged at 13,000 rpm at 4°C for 20 min. Pellets were washed with ice cold acetone, then dissolved in 100  $\mu$ L 2 $\times$  SDS loading buffer and heated at 95°C for 10 min.

### ***RNA FISH***

Cells were seeded on slides, washed once with 1 $\times$ PBS, fixed with 4% paraformaldehyde at room temperature for 10 min, and then permeabilized with 0.2% Triton X-100 for 5 min. The cells were washed twice with 1 $\times$ PBS and incubated with prehybridization buffer for 30 min at 37°C. The FISH

probe was added to the hybridization buffer at a dilution of 1:1000, and the cells were incubated in a humidified chamber in the dark at 37°C for 14 h. After hybridization, slides were washed 3 times with Wash Buffer I (4×SSC with 0.1% Tween-20), once each with Wash Buffer II (2×SSC) and Wash Buffer III (1×SSC) at 42°C for 5 min in the dark, and once with 1×PBS at room temperature. Then, the cells were stained with Hoechst 33342 for 10 min in the dark. Images were captured with a confocal microscope (Nikon). *Cpmer*-as-cy3 and *Cpmer*-s-cy3 probes were designed and synthesized by RiboBio Co., Ltd. Mouse U6 probes (LNC110103, RiboBio) and 18S probes (LNC110104, RiboBio) were used as the nuclear and cytoplasmic controls, respectively.

### ***mRNA stability***

Cells were treated with actinomycin D (S8964, Selleck) at a concentration of 100 µg/mL for different time intervals (0, 0.5, 1, 2, and 4 h). The cells were harvested, and RNA was extracted and analyzed by qRT-PCR. The remaining RNA levels of interest at each time point were normalized to those at the beginning.

### ***Quantitative real-time PCR***

Total RNA was extracted with RNAiso Reagent (TaKaRa) according to the manufacturer's instructions. cDNA was synthesized with the PrimeScript RT reagent Kit (TaKaRa) by reverse transcribing 500 ng of total RNA. The resultant cDNA was diluted in double-distilled water, and 5 ng was used in each reaction. Quantitative real-time PCR was performed on an Mx3000 instrument (Agilent) using SYBR<sup>®</sup> Premix Ex Taq (TaKaRa, RR420A) and gene-specific primers. Samples were run in biological triplicate. Gene expression was normalized to the housekeeping gene GAPDH and calculated using the  $2^{-\Delta\Delta Ct}$  method. Each experiment was performed in triplicate and repeated 3 times. The primer sequences are listed in Table S5.

### ***Immunofluorescence staining***

Cells were washed once with 1×PBS and fixed with 4% paraformaldehyde at room temperature for 20 min. Then, the cells were permeabilized with 0.2% Triton X-100 for 8 min. The cells were washed twice with 1×PBS, blocked in 10% FBS for 1 h, and incubated overnight with primary antibodies at the appropriate dilution at 4°C. Then, the cells were washed twice and incubated with AlexaFluor-488- or AlexaFluor-594-conjugated secondary antibody (Invitrogen) for 2 h at 4°C and counterstained with Hoechst 33342. Finally, the cells were examined under a fluorescence microscope to capture fluorescent images. Details of antibodies are listed in Table S6.



### ***Western blotting***

Cells were collected and washed in 1×PBS and incubated in 1×SDS lysis buffer supplemented with 1×Protease Inhibitor Cocktail (Roche) for 10 min on ice. The cells were centrifuged at 12,000 rpm for 15 min at 4°C, and equal amounts of cell lysates were resolved by 10% Bis-Tris SDS-PAGE and then transferred to polyvinylidene difluoride (PVDF) membranes (Millipore). Nonspecific binding was blocked by incubating in 3% BSA in TBST at 4°C for 2 h. Then, the blots were incubated with various primary antibodies in TBST at 4°C overnight. After washing with TBST 3 times, the blots were incubated with the appropriate secondary antibody for 2 h at 4°C. Signals were visualized by adding SuperSignal West Pico Chemiluminescent Substrate (Thermo Scientific) in enhanced chemiluminescence (ECL, ImageQuant LAS 4000 mini). GAPDH was used as the loading control. The anti-eEF1A antibody was unable to distinguish eEF1A1 and eEF1A2 protein. Details of antibodies are listed in Table S6.

### **References:**

- Ng, S.Y., Johnson, R., and Stanton, L.W. (2012). Human long non-coding RNAs promote pluripotency and neuronal differentiation by association with chromatin modifiers and transcription factors. *EMBO J* 31, 522-533.
- Perez-Riverol, Y., Bai, J., Bandla, C., Garcia-Seisdedos, D., Hewapathirana, S., Kamatchinathan, S., Kundu, D.J., Prakash, A., Frericks-Zipper, A., Eisenacher, M., et al. (2022). The PRIDE database resources in 2022: a hub for mass spectrometry-based proteomics evidences. *Nucleic Acids Res* 50, D543-D552.
- Shevchenko, A., Tomas, H., Havlis, J., Olsen, J.V., and Mann, M. (2006). In-gel digestion for mass spectrometric characterization of proteins and proteomes. *Nat Protoc* 1, 2856-2860.

| <b>Table S4. Primers used for vector construction.</b> |                                                                |    |                     |
|--------------------------------------------------------|----------------------------------------------------------------|----|---------------------|
| <b>Primer Name</b>                                     | <b>Sequence</b>                                                |    | <b>Product Size</b> |
| <i>Cpmer-KO-gRNA-1</i>                                 | CACCGAGCCTCTTGTGACTCGGGAC                                      | S  | N/A                 |
|                                                        | AAACGTCCCGAGTCACAAGAGGCTC                                      | AS |                     |
| <i>Cpmer-KO-gRNA-2</i>                                 | CACCGAGTGGGCCTGGTAGCTTACC                                      | S  | N/A                 |
|                                                        | AAACGGTAAGCTACCAGGCCCACTC                                      | AS |                     |
| <i>Rosa26-Cpmer-BglII</i>                              | GGAAGATCTAGAGCCCTTTGTGCGACTCTTT                                | F  | 586 bp              |
| <i>Rosa26-Cpmer-MfeI</i>                               | CCGCAATTGCTTTTGTTTTTTGTTCATGTG                                 | R  |                     |
| <i>pBSK-Cpmer-EcoRI</i>                                | CCGGAATTCAGAGCCCTTTGTGCGACTCTTT                                | F  | 590 bp              |
| <i>pBSK-Cpmer-NotI</i>                                 | TTTATAGCGGCCGCTTTTGTTTTTTGTTCATGT                              | R  |                     |
| <i>m-Eef1a2-sh1</i>                                    | CCGGGTCGGGTTCAATGTGAAGAATCTCGAGAT<br>TCTTCACATTGAACCCGACTTTTTG | S  | N/A                 |
|                                                        | AATTCAAAAAGTCGGGTTCAATGTGAAGAATCT<br>CGAGATTCTTCACATTGAACCCGAC | AS |                     |
| <i>m-Eef1a2-sh2</i>                                    | CCGGGAGCGTAAGGAAGGAAATGCACTCGAGT<br>GCATTTCTTCCTTACGCTCTTTTTG  | S  | N/A                 |
|                                                        | AATTCAAAAAGAGCGTAAGGAAGGAAATGCACT<br>CGAGTGCATTTCTTCCTTACGCTC  | AS |                     |
| <i>Cpmer-sh1</i>                                       | CCGGGGATGATTCCAGACAGCAACCCTCGAGG<br>GTTGCTGTCTGGAATCATCCTTTTTG | S  | N/A                 |
|                                                        | AATTCAAAAAGGATGATTCCAGACAGCAACCCT<br>CGAGGGTTGCTGTCTGGAATCATCC | AS |                     |
| <i>Cpmer-sh2</i>                                       | CCGGGCAACCTCAAGGCTCTACATGCTCGAGC<br>ATGTAGAGCCTTGAGGTTGCTTTTTG | S  | N/A                 |
|                                                        | AATTCAAAAAGCAACCTCAAGGCTCTACATGCT<br>CGAGCATGTAGAGCCTTGAGGTTGC | AS |                     |
| <i>h-CPMER-sh1</i>                                     | CCGGGTGATGTCTGCCACGAATATACTCGAGTA<br>TATTCGTGGCAGACATCACTTTTTG | S  | N/A                 |
|                                                        | AATTCAAAAAGTGATGTCTGCCACGAATATACTC<br>GAGTATATTCGTGGCAGACATCAC | AS |                     |
| <i>h-CPMER-sh2</i>                                     | CCGGACCTGACCCAGCGCTTAATTCTCGAGAA<br>TTAAGCGCTGGGGTCAGGTTTTTTG  | S  | N/A                 |
|                                                        | AATTCAAAAACCTGACCCAGCGCTTAATTCTC<br>GAGAATTAAGCGCTGGGGTCAGGT   | AS |                     |
| <i>h-EEF1A2-sh1</i>                                    | CCGGGCTGGAAGGTGGAGCGTAAGGCTCGAG<br>CCTTACGCTCCACCTTCCAGCTTTTTG | S  | N/A                 |
|                                                        | AATTCAAAAAGCTGGAAGGTGGAGCGTAAGGCT<br>CGAGCCTTACGCTCCACCTTCCAGC | AS |                     |
| <i>h-EEF1A2-sh2</i>                                    | CCGGGCAGGACGTGTACAAGATTGGCTCGAGC<br>CAATCTTGACACGTCCTGCTTTTTG  | S  | N/A                 |
|                                                        | AATTCAAAAAGCAGGACGTGTACAAGATTGGCT<br>CGAGCCAATCTTGACACGTCCTGC  | AS |                     |

|                                                                          |                                                                   |   |                                                                                   |
|--------------------------------------------------------------------------|-------------------------------------------------------------------|---|-----------------------------------------------------------------------------------|
| Fugw-Flag- <i>Eef1a2</i> -BamHI                                          | CGCGGATCCATGGATTACAAGGATGACGACGAT<br>AAGGGCAAGGAGAAGACACACATCA    | F | 1434 bp                                                                           |
| Fugw- <i>Eef1a2</i> -EcoRI                                               | CCGGAATTCTCACTTGCCCGCTTTCTGAGCCTT<br>CT                           | R |                                                                                   |
| <i>Cpmer</i> - <i>Agel</i>                                               | AAATATACCGGTAGAGCCCTTTGTGCGACTC                                   | F | 588 bp                                                                            |
| <i>Cpmer</i> - <i>EcoRI</i>                                              | CCGGAATTCTTTTGTTTTTTGTTCATGTG                                     | R |                                                                                   |
| <i>Cpmer</i> - <i>Exon2</i> - <i>Agel</i>                                | AAATATACCGGTGTCGAGGAGTCACCAGATGTG<br>A                            | F | 177 bp                                                                            |
| <i>Cpmer</i> - <i>Exon2</i> - <i>EcoRI</i>                               | CCGGAATTCTGTGGAGTAGGCTGACAAC                                      | R |                                                                                   |
| <i>Cpmer</i> - <i>Exon3</i> - <i>Agel</i>                                | AAATATACCGGTTGCTAGTGGGCCTGGTAGCT                                  | F | 316 bp (RP:<br><i>Cpmer</i> - <i>EcoRI</i> )                                      |
| <i>pMS2</i> - <i>Cpmer</i> - <i>HindIII</i> - <i>F</i>                   | CCGGAAGCTTAGAGCCCTTTGTGCGACTCTTTGG<br>CT                          | F | 587 bp                                                                            |
| <i>pMS2</i> - <i>Cpmer</i> - <i>EcoRI</i> - <i>R</i>                     | CCGGGAATTCTTTTGTTTTTTGTTCATGTGTGT<br>GGCATG                       | R |                                                                                   |
| <i>pMS2</i> - <i>Renilla</i> - <i>HindIII</i> - <i>F</i>                 | CCGGAAGCTTATGACTTCGAAAGTTTATGATCC<br>AG                           | F | 956 bp                                                                            |
| <i>pMS2</i> - <i>Renilla</i> - <i>EcoRI</i> - <i>R</i>                   | CCGGGAATTCTTATTGTTCATTTTTGAGAACTC                                 | R |                                                                                   |
| Fugw- <i>ms</i> - <i>Eomes</i> -BamHI                                    | GGCCGGATCCATGCAGTTGGGAGAGCAGCTCC                                  | F | 2267 bp                                                                           |
| Fugw- <i>ms</i> - <i>Eomes</i> -EcoRI                                    | CCGGGAATTCCTAGGGACTTGTGTAAAAAGCAT                                 | R |                                                                                   |
| 5' RACE primer                                                           | CAGTGGAAGATCAGTGAG                                                | F | N/A                                                                               |
| 3' RACE primer                                                           | GGCTGAGATAACCAAGTC                                                | R |                                                                                   |
| <i>Fugw</i> - <i>Myc</i> - <i>Eomes</i> - <i>FL</i> - <i>5'</i>          | GGCCGGATCCATGGAGCAGAACTCATCTCTGA<br>AGAGGATCTGCAGTTGGGAGAGCAGCTCC | F | 2118 bp                                                                           |
| <i>Fugw</i> - <i>Myc</i> - <i>Eomes</i> - <i>FL</i> - <i>3'</i>          | CCGGGAATTCCTAGGGACTTGTGTAAAAAGCAT                                 | R |                                                                                   |
| <i>Fugw</i> - <i>Myc</i> - <i>Eomes</i> - $\Delta$ <i>BS</i> - <i>R</i>  | CGGGGAGGAGGCTGACGCTCGAGTAGAAGTGC<br>GCGCCGGG                      | R | 125 bp (FP:<br><i>Fugw</i> - <i>Myc</i> - <i>Eomes</i> - <i>FL</i> - <i>5'</i> )  |
| <i>Fugw</i> - <i>Myc</i> - <i>Eomes</i> - $\Delta$ <i>BS</i> - <i>F</i>  | CCGGCGCGCACTTCTACTCGAGCGTCAGCCTC<br>CTCCCCGG                      | F | 1974 bp (RP:<br><i>Fugw</i> - <i>Myc</i> - <i>Eomes</i> - <i>FL</i> - <i>3'</i> ) |
| <i>Fugw</i> - <i>Myc</i> - <i>Eomes</i> - $\Delta$ <i>ELS</i> - <i>R</i> | CTGCCCGGAAACTTCTTGACCCTCCGCCTCC<br>CCCTCCTCCTCCGCCTCCTCC          | R | 153 bp (FP:<br><i>Fugw</i> - <i>Myc</i> - <i>Eomes</i> - <i>FL</i> - <i>5'</i> )  |
| <i>Fugw</i> - <i>Myc</i> - <i>Eomes</i> - $\Delta$ <i>ELS</i> - <i>F</i> | GGAGGAGGAGGGGGAGGCGGAGGGTCCAAGA<br>AGTTTCCGGGCAGTCTC              | F | 1938 bp (RP:<br><i>Fugw</i> - <i>Myc</i> - <i>Eomes</i> - <i>FL</i> - <i>3'</i> ) |
| <i>Fugw</i> - <i>h</i> - <i>EOMES</i> -BamHI                             | CCGACCGGTATGCAGTTAGGGGAGCAGCTCT                                   | F | 2261 bp                                                                           |
| <i>Fugw</i> - <i>h</i> - <i>EOMES</i> -EcoRI                             | CCGGGAATTCCTAGGGAGTTGTGTAAAAAGCAT<br>AA                           | R |                                                                                   |
| Fugw-Flag- <i>h</i> - <i>EEF1A2</i> - <i>Agel</i>                        | CCGACCGGTATGGATTACAAGGATGACGACG<br>ATAAGGGCAAGGAGAAGACCCAC        | F | 1436 bp                                                                           |
| Fugw- <i>h</i> - <i>EEF1A2</i> -EcoRI                                    | CCGGGAATTCCTCACTTGCCCGCCTTCTGCG                                   | R |                                                                                   |
| Abbreviation: RP: Reverse Primer; FP: Forward Primer                     |                                                                   |   |                                                                                   |

**Table S5. Primers used in RT-qPCR.**

| <b>Gene Name</b> | <b>Forward Sequence</b>  | <b>Reverse Sequence</b>  | <b>Species</b>  | <b>Product Size</b> |
|------------------|--------------------------|--------------------------|-----------------|---------------------|
| <i>Gapdh</i>     | GTGTTCTAACCCCAATGTGTC    | ATTGTCATACCAGGAAATGAGCTT | mouse/<br>human | 248 bp              |
| <i>Nkx2.5</i>    | ACATTTTACCCGGGAGCCTA     | CGCTCCAGCTCGTAGACC       | mouse           | 194 bp              |
| <i>cTnT</i>      | CGTGGAGAAGGACCTGAATG     | CCCCTCATTGCGAATAC        | mouse           | 152 bp              |
| <i>Eomes</i>     | CCCTATGGCTCAAATTCCAC     | CCAGAACCACTTCCACGAAA     | mouse           | 141 bp              |
| <i>T</i>         | GCTCTAAGGAACCAACCGGTCATC | ATGGGACTGCAGCATGGACAG    | mouse           | 111 bp              |
| <i>Cpmer</i>     | GTCGAGGAGTCACCAGATGT     | GGAGTAGGCTGACAACCATGA    | mouse           | 152 bp              |
| <i>Eef1a2</i>    | ACTCCACGGAACCAAGCCTA     | GGGCAGGATTGTGTCCAGG      | mouse           | 245 bp              |
| <i>Rpsa</i>      | TGCGGGAACCCACTTAGGT      | AGGATTCTCGATGGCAACAATAG  | mouse           | 154 bp              |
| <i>Rpl3</i>      | GGAAAGTGAAGAGCTTCCCTAAG  | CTGTCAACTTCCCGGACGA      | mouse           | 106 bp              |
| <i>Eef1a1</i>    | CAACATCGTCGTAATCGGACA    | GTCTAAGACCCAGGCGTACTT    | mouse           | 160 bp              |
| <i>Eif2s</i>     | CACCGCTGTTGACAGTCAGAG    | GCAAACAATGTCCCATCCTTACT  | mouse           | 142 bp              |
| <i>Tbx5</i>      | ATGGCCGATACAGATGAGGG     | TTCGTGGAACTTCAGCCACAG    | mouse           | 207 bp              |
| <i>Myh6</i>      | GACGCCCAGATGGCTGACTT     | GGTCAGCATGGCCATGTCTT     | mouse           | 276 bp              |
| <i>Tbx20</i>     | AAACCCCTGGAACAATTTGTGG   | CATCTCTTCGCTGGGGATGAT    | mouse           | 171 bp              |
| <i>Acta1</i>     | CCCAAAGCTAACCCGGGAGAAG   | CCAGAATCCAACACGATGCC     | mouse           | 134 bp              |
| <i>Cpmer-E1</i>  | GCCCTTTGTCGACTCTTTGG     | CCAACAGAGACTGACCCTCCT    | mouse           | 103 bp              |
| <i>Cpmer-E3</i>  | AGCTCTGGGTTGGACTGAGA     | TTTCATGTGTGTGGCATGTG     | mouse           | 191 bp              |
| <i>Col1a1</i>    | GCTCCTCTTAGGGGCCACT      | CCACGTCTCACCATTGGGG      | mouse           | 103 bp              |
| <i>Col3a1</i>    | CTGTAACATGGAAACTGGGGAAA  | CCATAGCTGAACTGAAAACCACC  | mouse           | 144 bp              |
| <i>Ckap4</i>     | TCCCGTCAGAGGGATGAGC      | GCTGGGAGTTTCTCAGGAGG     | mouse           | 109 bp              |
| <i>CPMER</i>     | CCAAATGTGAAGGTGTAA       | GCCAATCTTAATCTGACA       | human           | 94 bp               |
| <i>CTNT</i>      | ACAGAGCGGAAAAGTGGGAAG    | TCGTTGATCCTGTTTCGGAGA    | human           | 230 bp              |
| <i>TBX20</i>     | TCGTCCCTGTGGACAACAAG     | TTCAGGTTGAGCAATGAGGCT    | human           | 286 bp              |
| <i>MYH6</i>      | CGGTGCTTTTCAACCTCAAGG    | GGACTGGTTCTCCCGATCTGT    | human           | 221 bp              |
| <i>ACTA1</i>     | GGCATTACGAGACCACCTAC     | CGACATGACGTTGTTGGCATAAC  | human           | 84 bp               |
| <i>EEF1A2</i>    | TCGTGGGCGTGAACAAAATG     | GCTGACTTCCTTGACGATCTC    | human           | 80 bp               |
| <i>EOMES</i>     | CTGCCACTACAATGTGTTCCG    | GCGCCTTTGTTATTGGTGAGTTT  | human           | 211 bp              |
| <i>T</i>         | TATGAGCCTCGAATCCACATAGT  | CCTCGTTCTGATAAGCAGTCAC   | human           | 109 bp              |

**Table S6. Antibodies used in the study.**

| <b>Antibodies</b>    | <b>Company</b>     | <b>Catalog</b>  | <b>Species</b> | <b>Dilution<br/>WB</b> | <b>Dilution<br/>IF</b> | <b>Dilution<br/>FACS</b> |
|----------------------|--------------------|-----------------|----------------|------------------------|------------------------|--------------------------|
| Anti-cTnT            | Abcam              | ab8295          | Mouse          | N/A                    | 1:1000                 | N/A                      |
| Anti-Flk1            | Miltenyi<br>Biotec | 130-102-<br>559 | Mouse          | N/A                    | N/A                    | 1:250                    |
| Anti-Pdgfra          | Miltenyi<br>Biotec | 130-109-<br>784 | Mouse          | N/A                    | N/A                    | 1:250                    |
| Anti-eEF1A           | Santa Cruz         | sc-377439       | Mouse          | 1:500                  | N/A                    | N/A                      |
| Anti-GAPDH           | Bioworld           | AP0063          | Rabbit         | 1:3000                 | N/A                    | N/A                      |
| Anti-EOMES           | Abcam              | ab23345         | Rabbit         | 1:2000                 | 1:1000                 | N/A                      |
| Anti-T               | Abcam              | ab209665        | Rabbit         | 1:2000                 | 1:1000                 | N/A                      |
| Anti-GFP             | Abcam              | ab290           | Rabbit         | N/A                    | 1:1000                 | N/A                      |
| Anti-Myc tag         | Abcam              | ab9132          | Mouse          | 1:3000                 | N/A                    | N/A                      |
| Anti-Sox2            | CST                | #23064          | Rabbit         | 1:1000                 | N/A                    | N/A                      |
| Anti-Oct4            | Abcam              | ab19857         | Rabbit         | 1:2000                 | N/A                    | N/A                      |
| Anti-Klf4            | Santa Cruz         | sc-20691        | Rabbit         | 1:2000                 | N/A                    | N/A                      |
| Anti-mouse IgG, HRP  | CST                | 7076s           | N/A            | 1:3000                 | N/A                    | N/A                      |
| Anti-Rabbit IgG, HRP | CST                | 7074s           | N/A            | 1:3000                 | N/A                    | N/A                      |

## Supplementary Data

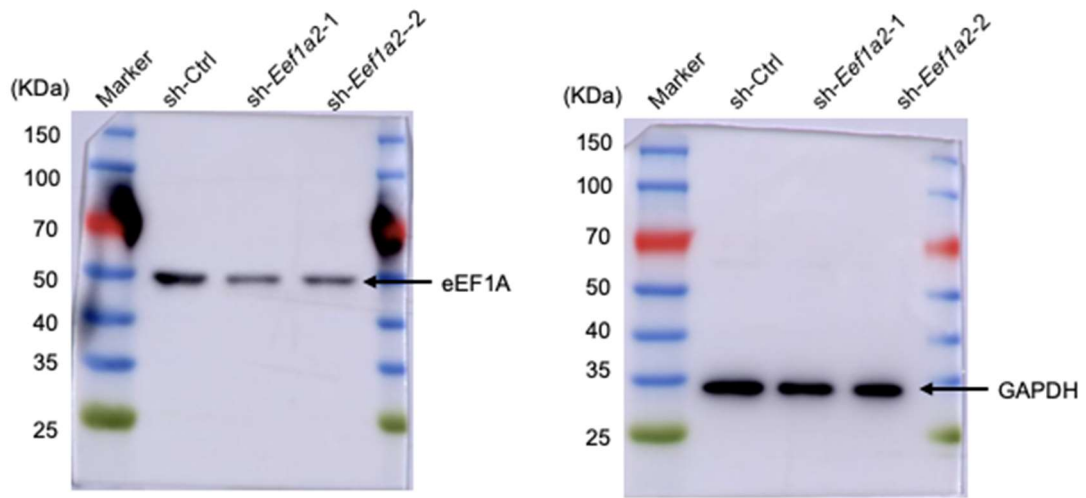

Whole membrane image 1. The efficiency of *Eef1a2* knockdown at mesoderm stage. Related to Figure 3F.

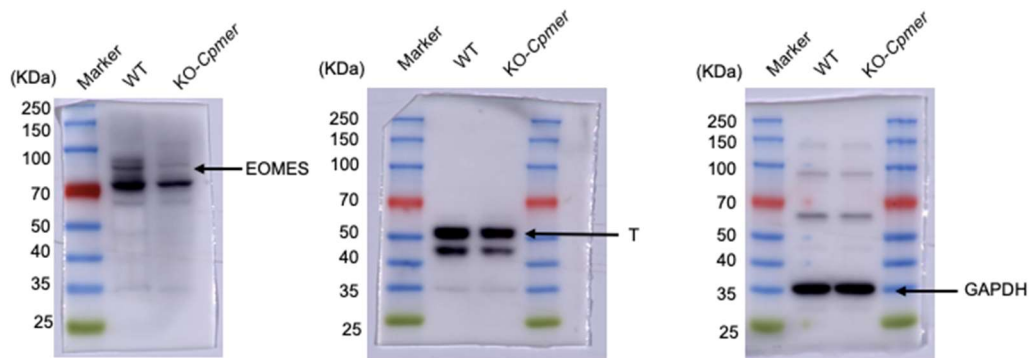

Whole membrane image 2. The EOMES and T protein levels at mesoderm stage in the WT and KO-*Cpmer* cells. Related to Figure 4B.

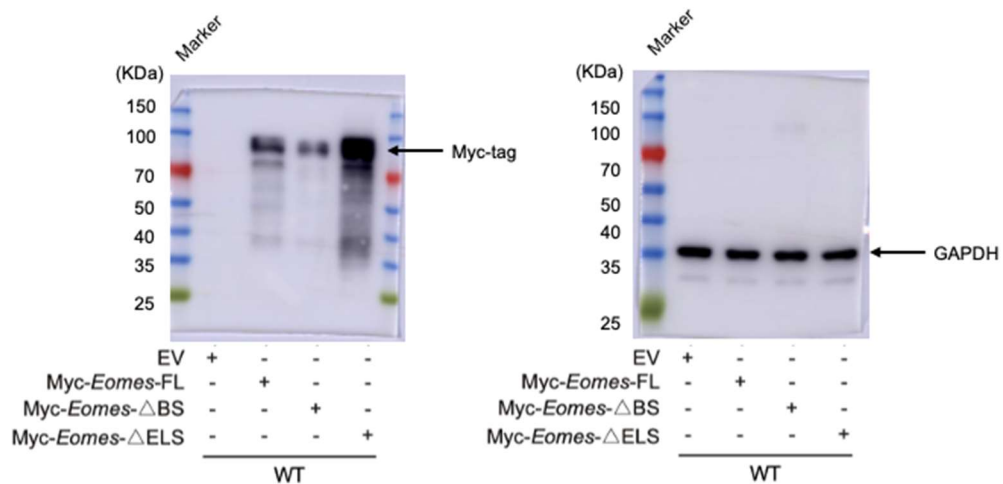

Whole membrane image 3. The exogenous Eomes expression in the WT cells transfected with full-length (FL) or deletion mutant *Eomes* at mesoderm stage. Related to Figure 4G.

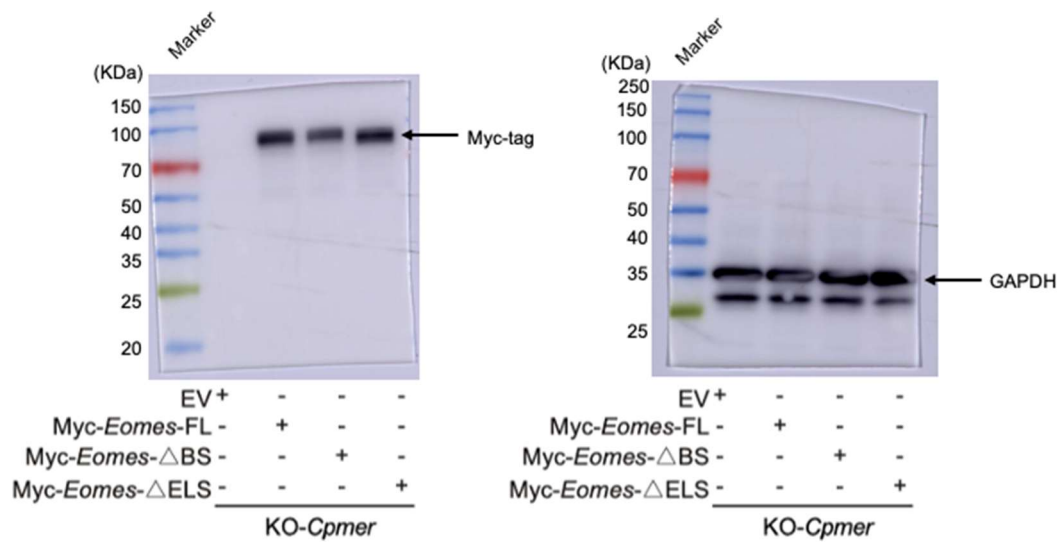

Whole membrane image 4. The exogenous Eomes expression in the KO-Cpmer cells transfected with FL or deletion mutant *Eomes* at mesoderm stage. Related to Figure 4H.

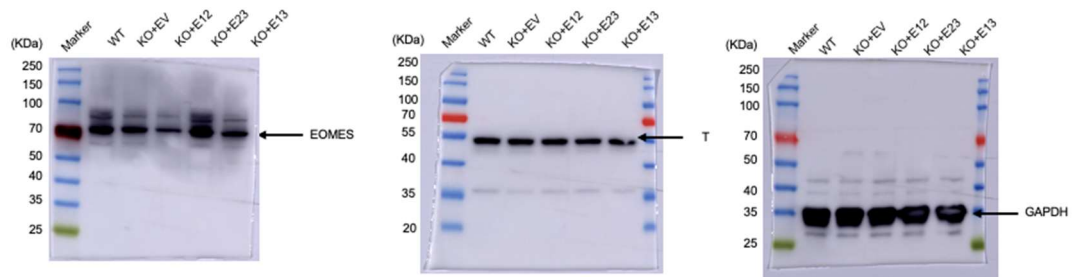

Whole membrane image 5. The EOMES and T protein levels in the WT and KO-Cpmer cells transfected with the double-exon mutants of *Cpmer* at mesoderm stage. Related to Figure 5E.

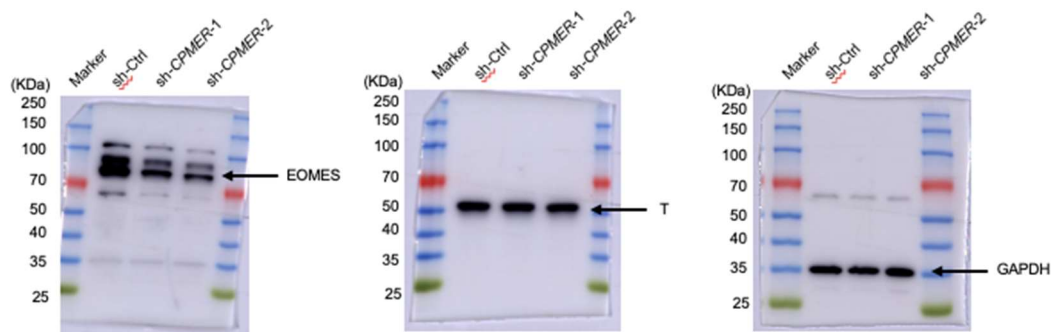

Whole membrane image 6. The EOMES and T protein levels in *CPMER*-knockdown cells at mesoderm stage. Related to Figure 6C.

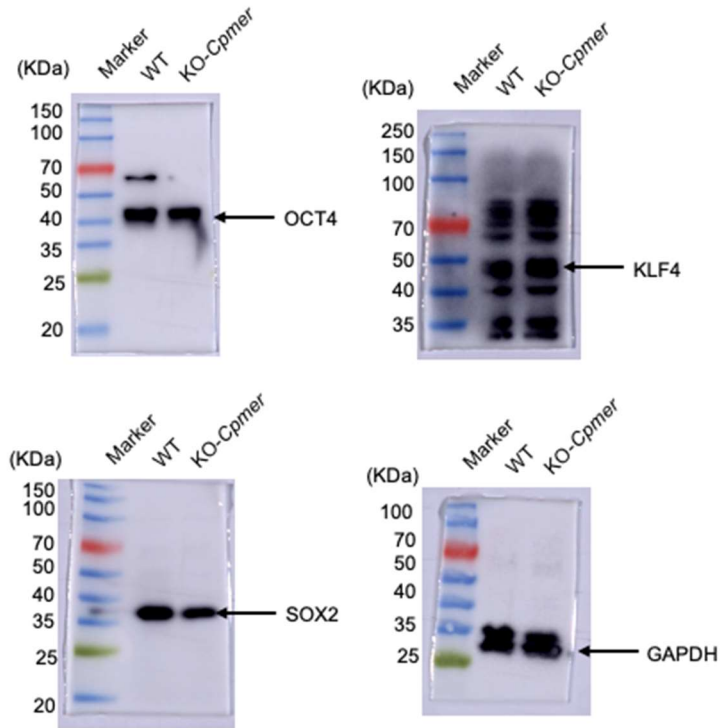

Whole membrane image 7. The expression level of pluripotency markers in the WT and KO-*Cpmer* cells. Related to Figure S2C.

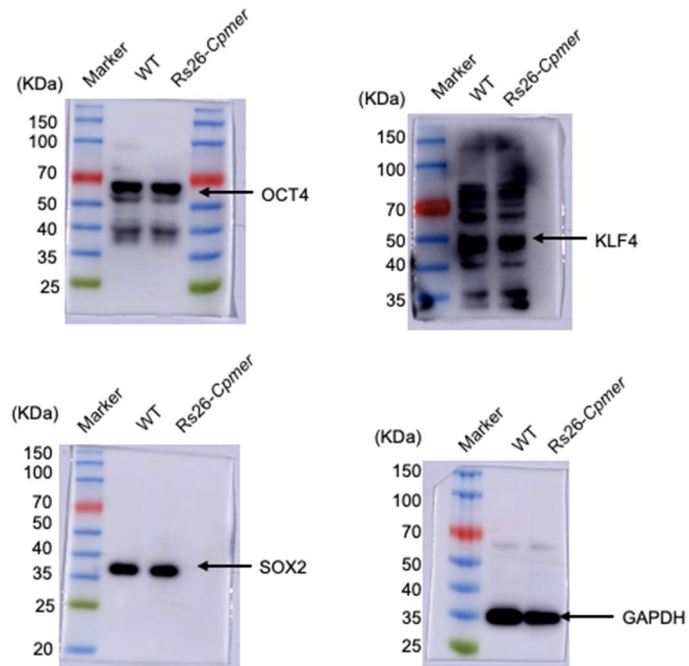

Whole membrane image 8. The expression level of pluripotency markers in the WT and Rs26-*Cpmer* cells. Related to Figure S2I.



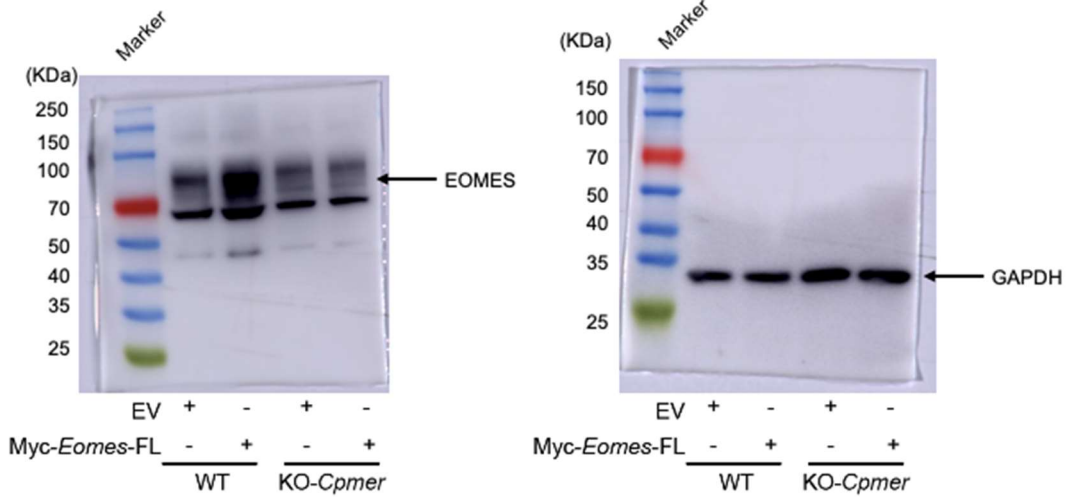

Whole membrane image 9. The EOMES levels in the WT and KO-Cpmer cells transfected with Myc-Eomes-FL at mesoderm stage. Related to Figure S4A.

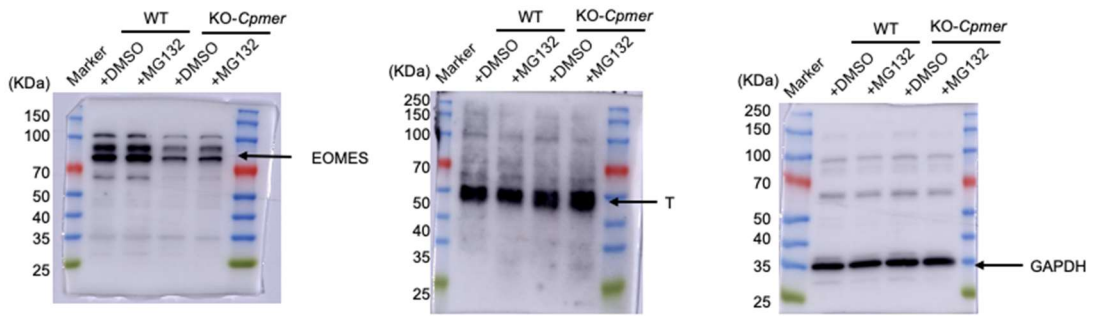

Whole membrane image 10. The EOMES and T levels in the WT and KO-Cpmer cells treated with MG132 at mesoderm stage. Related to Figure S4C.

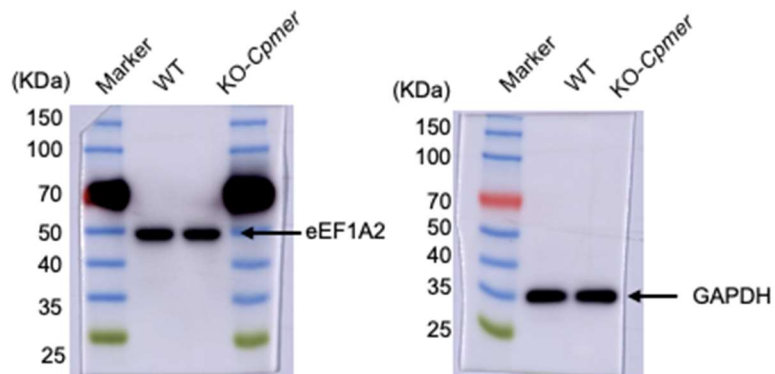

Whole membrane image 11. The eEF1A levels in the WT and KO-Cpmer cells. Related to Figure S4F.

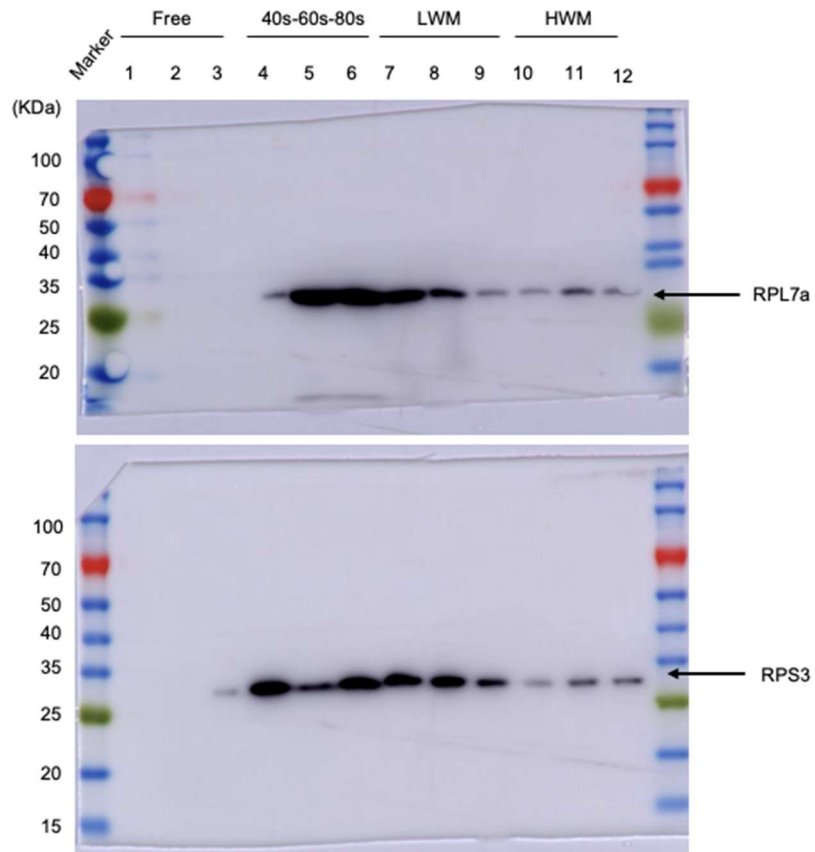

Whole membrane image 12. Western blotting analysis of polysome profile with RPL7a and RPS3 at mesoderm stage. Related to Figure S4G.

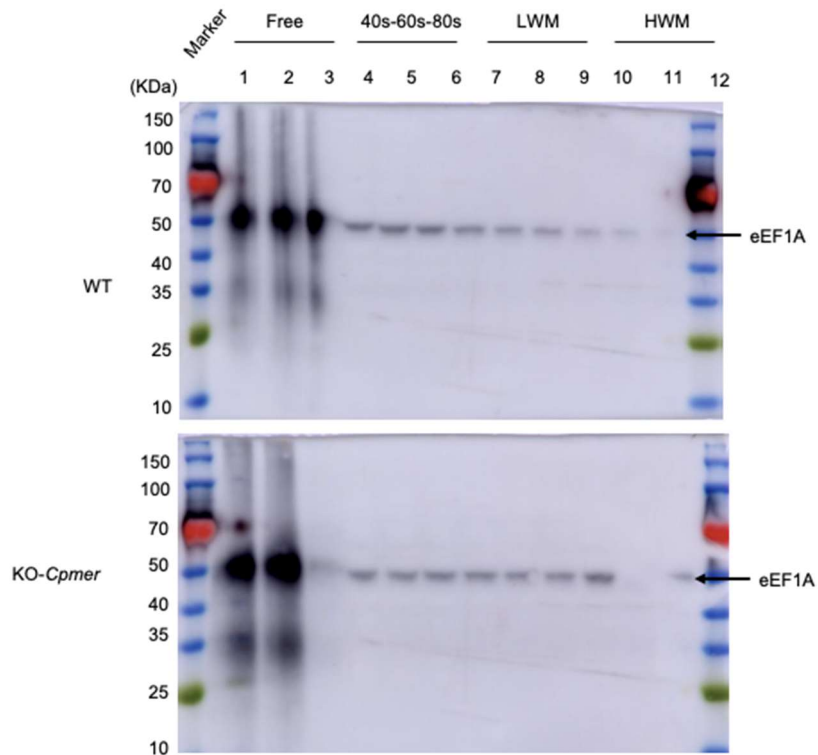

Whole membrane image 13. The eEF1A distribution in polysome fractions of the WT and KO-*Cpmer* cells at mesoderm stage. Related to Figure S4H.

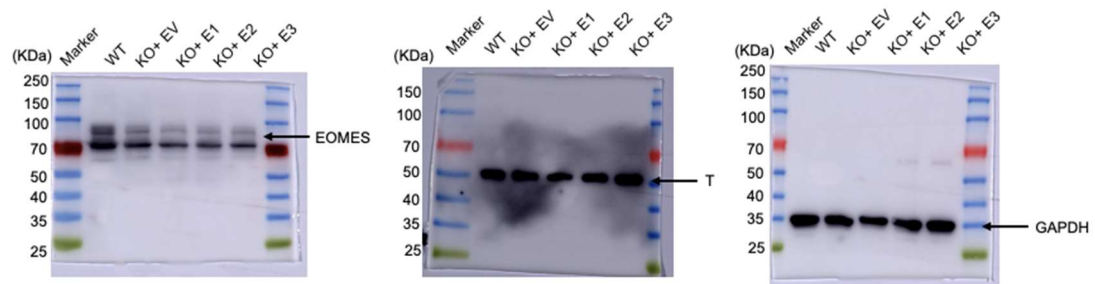

Whole membrane image 14. The EOMES and T expression levels in the KO-*Cpmer* cells transfected with different single-exon mutants of *Cpmer* at mesoderm stage. Related to Figure S5E.
